# Supplementary material for: Identification of Key Genes Associated with Progression and Prognosis of Bladder Cancer through Integrated Bioinformatics Analysis
Source: MDPI journal article supplement (doi:10.3390/cancers13235931), 2021-11-25
Supplement: s1 [file s1]

**Table S1.** List of Primers used for qRT-PCR

| Genes       | Sequence (5'.....3')    |
|-------------|-------------------------|
| CDC20_qFor  | CAAGGAGAACCAGCCTGAAA    |
| CDC20_qRev  | GGATCTTGGCTTCCTCTACATC  |
|             |                         |
| S100A9_qFor | GCTGGAACGCAACATAGAGA    |
| S100A9_qRev | TCGCACCAGCTCTTTGAAT     |
|             |                         |
| MAGEA6_qFor | ACTACCATGAACTACCCTCTCT  |
| MAGEA6_qRev | TACTGAGTGCTGCTTGGAAC    |
|             |                         |
| CDKN2A_qFor | ACGGGTCGGGTGAGAGT       |
| CDKN2A_qRev | GGAAACTGGAAGCAAATGTAGGG |
|             |                         |
| KRT23_qFor  | GGTGACATCCACGAACTGAA    |
| KRT23_qRev  | AGACTGGGTCTCGGATAACA    |
|             |                         |
| FOXM1_qFor  | GCAGCTAGGGATGTGAATCTT   |
| FOXM1_qRev  | AAGCCACTGGATGTTGGATAG   |
|             |                         |
| TAGLN_qFor  | GTTCCAGACTGTTGACCTCTTT  |
| TAGLN_qRev  | CGGTAGTGCCCATCATTCTT    |
|             |                         |
| CTSV_qFor   | AGCCTCTGTTTCTTGATCTTCC  |
| CTSV_qRev   | GAGCACCAGTCGCACTAAA     |
